# Supplementary material for: A facile way to introduce planar defects into colloidal photonic crystals for pronounced passbands
Source: Royal Society of Chemistry journal article supplement (doi:10.1039/c4tc00912f), 2014-07-04

## A facile way to introduce planar defects into colloidal photonic crystals for pronounced pass bands

Kuo Zhong<sup>a</sup>; Pieter-Jan Demeyer<sup>a</sup>; Xingping Zhou<sup>b</sup>; Niels Verllen<sup>c,d</sup>; Olga Kruglova<sup>a</sup>; Victor V. Moshchalkov<sup>c</sup>; Kai Song<sup>e\*</sup>; Koen Clays<sup>a\*</sup>

<sup>a</sup> Department of Chemistry KU Leuven, Celestijnenlaan 200D, 3001 Heverlee (Leuven), Belgium;

<sup>b</sup> School of Electronic and Optical Engineering, Nanjing University of Science and Technology, Nanjing 210094, China;

<sup>c</sup> INPAC-Institute for Nanoscale Physics and Chemistry, KU Leuven, Celestijnenlaan 200 D, B-3001 Heverlee (Leuven), Belgium;

<sup>d</sup> IMEC, Kapeldreef 75, 3001 Heverlee (Leuven), Belgium;

<sup>e</sup> Laboratory of Bio-inspired Smart Interface Science, Technical Institute of Physics and Chemistry, Chinese Academy of Sciences, Beijing 100190, China.

**Fig. S1.** Photograph of monolayer solid silica spheres on the water surface

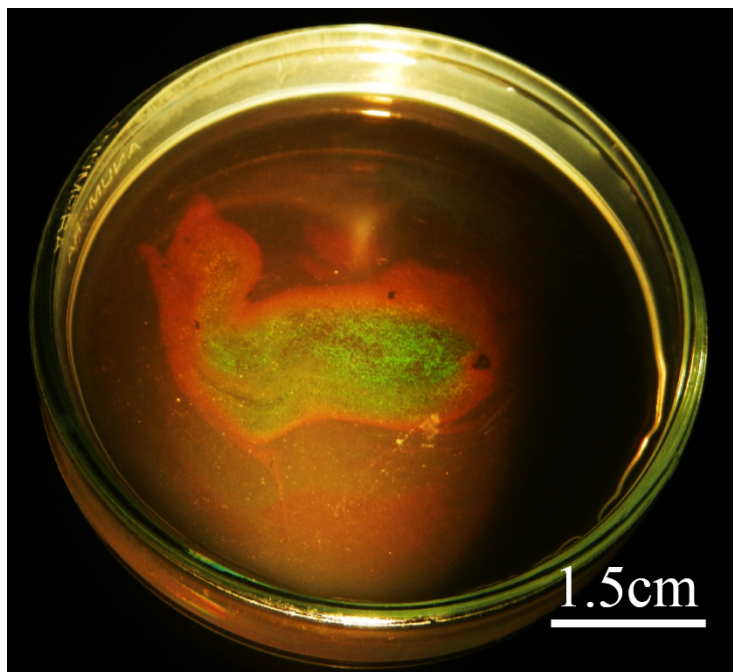

**Fig. S2.** The smaller monolayer of solid  $\text{SiO}_2$  spheres on the surface of  $\text{PS@SiO}_2$  (276 nm) CPCs. A) Diameter of 185 nm solid  $\text{SiO}_2$  spheres; B). Diameter of 263 nm solid  $\text{SiO}_2$  spheres

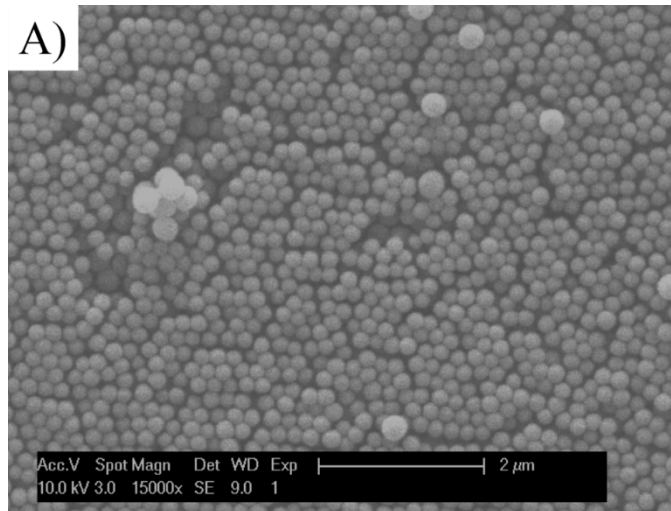

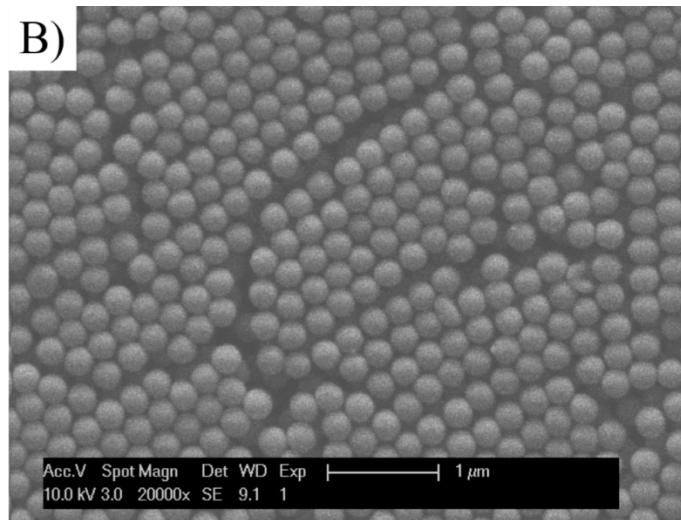

**Fig. S3.** A). a few representative reflectance spectra of the PS@SiO<sub>2</sub> (276nm) CPCs embedded 380nm monolayer solid silica spheres as a defect layer are taken from different points of the selected region; B). A microscope image showing different measuring points corresponding to the spectra of Fig. S3 A); C). A microscope image of hollow CCs containing a defect layer of 370 nm obtained after calcination. (Corresponding to the reflectance spectrum of Fig. 4h)

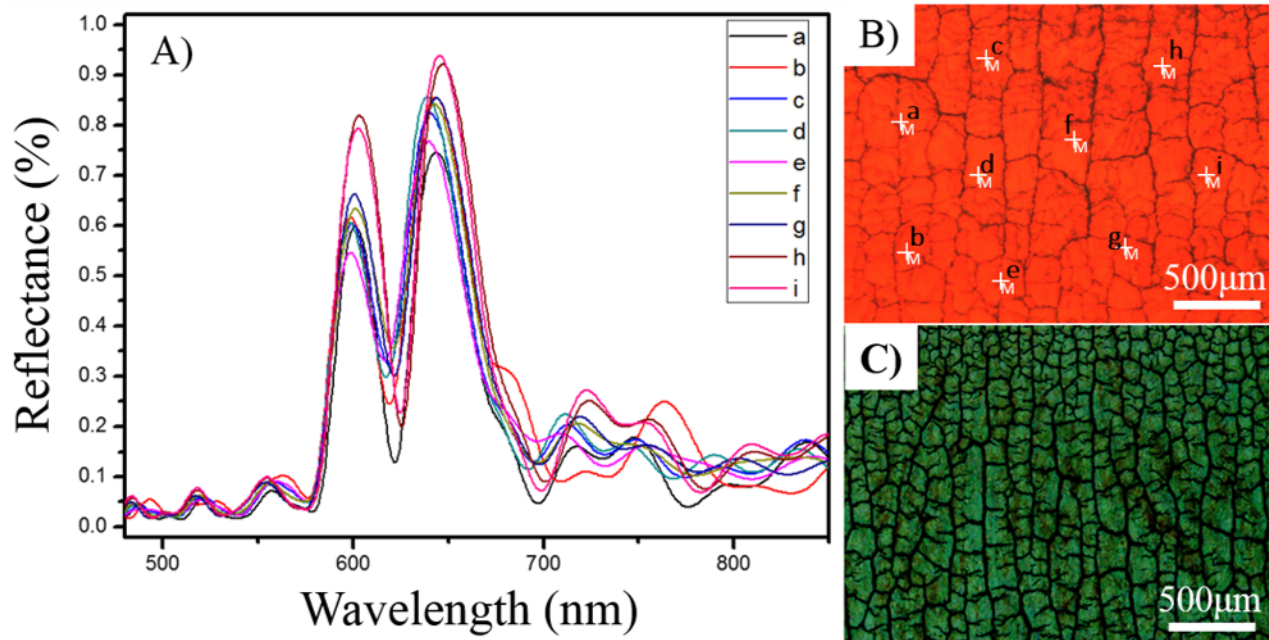

**Fig. S4.** The reflectance spectrum of obtained CPCs containing a defect layer of 380nm. The inset of this Fig. represents a magnified spectrum of the passband in the PBG. (Corresponding to Fig. 4d)

Q-value is given by following equation:

$$Q = \frac{\nu}{\Delta \nu} = \frac{\lambda}{\Delta \lambda}$$

Where  $\nu$  is the resonance frequency,  $\Delta\nu$  is the frequency width, the  $\lambda$  is the peak wavelength, and  $\Delta\lambda$  is the FWHM.

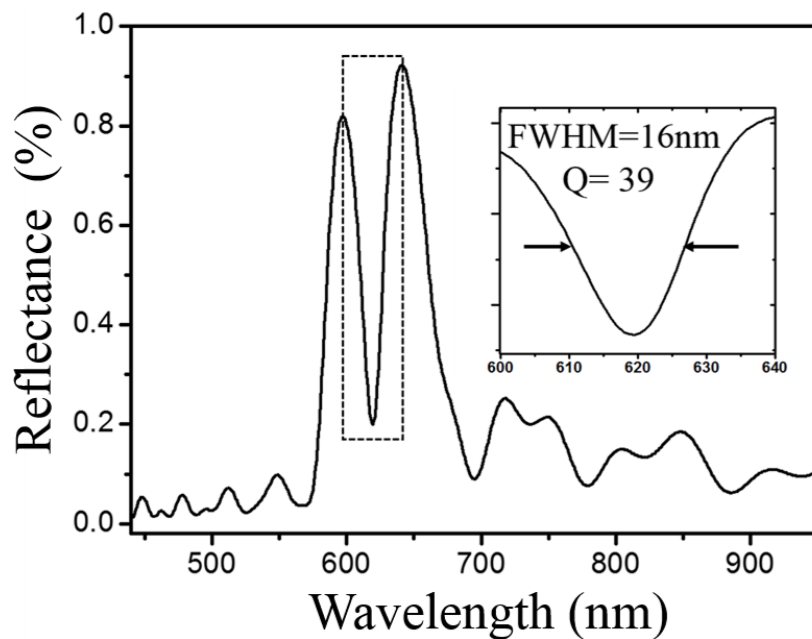

**Fig. S5.** Reflection spectra of the perfect CPCs for estimating the photonic band gap widths. A). PS@SiO<sub>2</sub> core-shell CCs; B).hollow SiO<sub>2</sub> spheres CCs

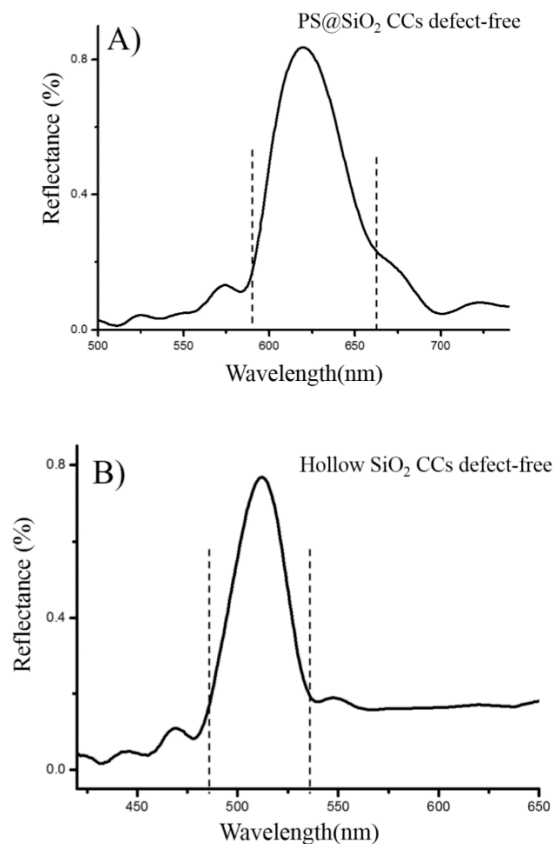

Supplement: c4tc00912f1.pdf [file c4tc00912f1.pdf]
